# Supplementary material for: Site selection for subtropical thicket restoration: mapping cold-air pooling in the South African sub-escarpment lowlands
Source: PeerJ. 2020 Apr 23;8:e8980. doi: 10.7717/peerj.8980 (PMC7183751; doi:10.7717/peerj.8980)
Supplement: Supplemental Information 2 [file peerj-08-8980-s002.xlsx]

## Sheet: Meta-data
lat	Latitude
lon	Longitude
Plot	Unique Plot Number
NPP	Aboveground net primary productivity (tons of carbon per hectare per year)
Diameter	Diameter (measured using Google Earth) of the valley in which the plot is situated)
Elevation	Plot level elevation extracted from the ALOS 30m (Takaku et al., 2014) Digital Elevation Model (DEM)
Slope	Slope of each plot (calculated using the Horn (1981) algorithm in the raster (Hijmans & van Etten, 2012) Package in R.
Cell.rank	rank elevation of each grid cell relative to the elevation of surrounding grid cells within the square with the specified radius in each cardinal direction from the grid cell (Lundquist et al. 2008, p. 6
Curvature	broad scale curvature, calculated using the Liston and Elder (2006) snow accumulation model
CAP	A binary value for each plot, designating whether it was classified as prone (value of 1) to cold air pooling (CAP) or not prone (value of 0) to CAP.
Experimental description: We used slope, landscape-level curvature and a landscape-level modification of topographic position index to establish whether cold air pooling (CAP) influenced net primary productivity (NPP) of Portulacaria afra (spekboom) cuttings planted in the Thicket Wide Plot (TWP) project. The TWP experiment consisted of 300 50x50m plots planted with spekboom cuttings in a variety…

## Sheet: TWP_RawData
lat	lon	Plot	Diameter	NPP	Elevation	Slope	Rank	Curvature	CAP
-33.0444	24.3532	P0001	963	0.894289	622	0.361541	0.523077	0.738093	0
-32.861	25.3201	P0002	2549	3.37564	655	2.73974	0.455621	-85.2661	0
-33.0359	24.1897	P0004	1156	0.0307935	717	2.25515	0.519481	4.41437	0
-32.9979	25.0874	P0005	1446	0.00496904	331	2.25632	0.505155	-5.81523	0
-33.1918	25.0444	P0006	986	0	367	2.69398	0.446154	3.4974	0
-32.1719	24.5899	P0008	1528	0.233096	831	6.3066	0.326733	-26.0599	1
-33.0297	25.299	P0009	1132	0.744382	453	1.0844	0.60274	2.35212	0
-32.3865	25.0033	P0010	6952	0.573215	1089	3.09406	0.616052	-788.999	0
-33.4336	25.3736	P0011	7947	6.86873	151	13.3752	0.406427	-87.9134	0
-32.8579	24.6745	P0013	1059	2.07083	472	8.75441	0.463768	-3.69639	0
-33.2382	24.8278	P0014	8210	1.82137	755	19.5122	0.759633	671.416	0
-32.8585	24.7163	P0015	2105	0.449769	682	2.05206	0.659574	45.9452	0
-32.7806	24.2891	P0017	4121	0.669311	864	17.1333	0.589744	103.157	0
-32.2078	24.2398	P0020	4785	1.26547	995	12.2686	0.425868	-307.082	0
-32.5424	24.3985	P0021	2132	0.0454735	810	3.29338	0.439716	-18.9917	0
-32.6946	24.7998	P0022	1188	0.629586	712	18.8958	0.831169	7.93444	0
-33.2304	25.41	P0023	853	1.89157	435	7.46623	0.263158	-6.32177	1
-32.4242	24.8446	P0024	11065	0.237681	791	6.41403	0.50882	-698.661	0
-32.7557	24.8605	P0025	4761	0	733	8.56742	0.599369	127.941	0
-32.7568	25.2823	P0028	8715	0.0631358	713	7.49935	0.407917	-813.474	1
-33.0864	24.7537	P0029	4338	0.261047	407	1.54875	0.349481	-47.9675	1
-32.6215	25.3573	P0030	2589	0.0124112	1079	10.557	0.306358	-181.508	0
-32.628	25.4156	P0031	4448	5.48971	966	12.8418	0.575758	-122.625	0
-33.4765	25.342	P0032	4051	3.15436	205	0.864983	0.475836	-17.27	0
-33.4363	25.2806	P0033	4316	0.0982545	165	0.466339	0.592982	-24.1002	0
-33.4327	25.3523	P0034	7947	1.14425	138	5.26349	0.381853	-82.5243	0
-33.4976	25.1465	P0035	9300	8.58231	385	11.9497	0.731079	317.654	0
-33.1821	24.8879	P0036	4141	0.856489	457	7.19563	0.718412	52.0054	0
-32.8859	24.5436	P0038	1668	0.828099	627	21.8612	0.422018	-0.58787	0
-33.2084	25.0752	P0039	2142	1.56659	336	14.4079	0.319149	-24.7392	0
-33.0491	24.5366	P0041	3348	1.21313	563	1.10515	0.542986	15.4341	0
-33.0055	25	P0042	1737	0	380	4.89252	0.814159	15.8399	0
-33.2145	25.5186	P0044	1840	3.16233	661	11.8024	0.603306	10.4152	0
-32.8822	24.4422	P0046	1329	0.241069	787	13.0844	0.719101	23.1387	0
-32.919	24.4342	P0047	1818	0.103565	661	5.81586	0.438017	-7.98711	1
-33.5156	25.3738	P0048	5183	0.336484	197	2.11592	0.466667	-0.202269	1
-33.2151	25.6596	P0049	896	4.45239	630	6.26094	0.666667	10.9162	0
-33.5085	25.411	P0051	1480	0.0116241	153	7.36223	0.484536	-4.88464	1
-33.4613	25.5964	P0054	6992	1.688	104	5.81289	0.526882	35.0231	0
-32.4296	24.6865	P0055	8087	3.53309	783	2.60138	0.536313	-213.208	0
-32.925	24.6065	P0056	1148	1.89558	505	12.78	0.61039	5.23055	0
-33.1574	24.4498	P0057	2331	0.00264361	676	1.8305	0.509804	-17.2626	1
-32.8688	24.7165	P0058	1130	2.6578	636	9.0552	0.493151	0.902157	0
-32.9032	24.3707	P0059	4656	0.576456	654	0.932616	0.317152	-26.0304	1
-33.0161	25.1532	P0060	1859	0.110774	332	2.57852	0.495868	-4.21976	0
-32.8542	24.3664	P0061	3326	0.153467	826	4.27912	0.728507	30.9485	0
-33.3358	25.1918	P0063	2343	6.41375	360	12.2988	0.477707	-68.8204	0
-33.5232	25.6098	P0065	3238	2.8383	133	0.362704	0.657277	89.7052	0
-33.5526	25.5597	P0066	1042	0.453034	133	8.88208	0.304348	-8.5336	1
-33.516	25.5929	P0067	2725	0.967658	120	16.0555	0.19337	22.1045	0
-32.3357	24.9568	P0072	8326	0.473014	1154	3.31864	0.641953	-52.2202	0
-33.0746	25.1261	P0073	5440	0.236695	262	9.02267	0.487535	-34.1746	0
-32.4953	25.0742	P0074	3586	0.00836639	964	9.06459	0.616034	230.971	0
-32.4953	25.0742	P0075	3586	0.560191	964	9.06459	0.616034	230.971	0
-33.004	25.3557	P0076	2626	0.227033	597	3.04097	0.705202	-18.4274	0
-32.5873	25.2646	P0078	8140	0.134619	905	7.80408	0.658041	-494.024	0
-32.5117	24.2994	P0079	8219	0.467353	907	4.89244	0.53578	183.203	0
-32.4662	24.2712	P0080	14523	0.453941	788	12.198	0.588235	-115.497	0
-32.7495	24.5087	P0081	5960	0.632362	638	6.50139	0.503778	-0.370079	0
-32.3667	24.8865	P0086	7345	1.63415	931	6.72766	0.419223	-239.379	1
-32.1533	24.6287	P0089	3379	0.7644	898	4.47485	0.284444	-124.934	1
-32.2295	24.6349	P0092	1137	0.0245777	943	7.84081	0.438356	-11.0551	0
-32.1162	24.7249	P0093	2459	0	1044	10.5556	0.484472	-53.1178	0
-33.35	25.0614	P0102	2311	0.459731	457	27.532	0.568627	110.198	0
-33.4987	25.3536	P0103	18158	0.874297	223	0	0.545906	315.562	0
-33.5023	25.3171	P0104	19744	4.51872	254	1.86474	0.518603	397.733	0
-32.9947	24.8194	P0106	4309	0.310143	406	13.6884	0.964912	91.8071	0
-33.1111	25.3386	P0107	8387	0.379649	360	8.33698	0.728905	-104.312	0
-33.0583	24.326	P0110	4614	1.68556	606	2.25523	0.580328	7.66903	0
-32.9092	24.3158	P0111	3143	0.0467139	662	1.44459	0.392344	-21.1186	0
-32.9972	25.2761	P0112	7441	3.11567	476	4.40153	0.313883	-342.849	0
-33.1489	24.6495	P0113	1476	0.316751	569	1.94497	0.391753	-2.28346	0
-32.8768	24.5686	P0114	1221	0.212441	670	2.50945	0.493827	-9.01885	0
-32.9016	24.6051	P0115	2286	1.31198	527	3.44145	0.398693	-21.5622	1
-32.6644	25.2492	P0116	16666	0.0217166	800	11.5017	0.774572	-2020.61	0
-32.8312	24.5231	P0117	7605	0.193357	655	2.90744	0.368317	60.3099	0
-32.3295	24.3882	P0119	14952	0.00408937	778	2.16272	0.941825	183.464	0
-33.3487	25.0874	P0121	2007	1.79402	317	9.21626	0.421053	-45.1835	0
-33.3143	25.0161	P0122	741	1.80673	467	8.11457	0.306122	-1.89378	1
-33.0931	24.8746	P0123	8960	2.94655	362	1.94487	0.61809	46.0546	0
-32.7659	24.6084	P0124	7625	1.73094	570	2.50851	0.640472	137.161	0
-33.2367	24.8829	P0125	914	0.624297	653	5.48652	0.459016	-4.95263	1
-32.7126	25.2884	P0126	1661	0.361372	731	10.5794	0.633028	-33.5352	0
-33.1899	24.9711	P0127	3548	0.0498505	397	2.84997	0.628692	-33.6664	0
-32.5486	24.9986	P0128	5250	1.80147	774	1.19376	0.719198	7.48586	0
-32.795	24.7627	P0129	917	0.0576126	693	3.58548	0.295082	-17.0689	1
-32.8564	24.8	P0130	4261	0.448954	639	1.80489	0.459649	-59.6009	0
-32.8039	25.1972	P0131	2786	2.44867	667	6.95306	0.8	85.873	0
-33.1928	25.2603	P0132	1799	1.4869	374	11.5355	0.358974	-20.5444	0
-33.365	24.9662	P0133	1303	3.78993	424	2.49808	0.329412	-6.87833	1
-33.4639	25.1164	P0134	4457	0.357282	293	2.49935	0.451178	17.2469	0
-33.427	25.2044	P0135	6063	2.04982	241	2.85026	0.733333	27.3633	0
-33.499	25.0612	P0136	1377	0.623733	325	4.46549	0.494382	-3.44779	0
-32.4222	24.9244	P0137	3541	0.0396137	902	1.65466	0.493671	-21.9549	1
-33.366	24.9746	P0138	4086	5.01431	429	4.70963	0.52381	-86.5993	1
-32.9505	24.8871	P0139	484	0.123768	389	3.96818	0.454545	-5.96786	0
-32.2887	24.455	P0140	4026	0.601611	775	3.58235	0.501859	-358.79	0
-33.3831	25.189	P0142	1130	3.72295	285	9.69041	0.465753	-18.5176	1
-33.5854	25.3467	P0144	1308	0.200311	338	10.9622	0.247059	-10.9045	0
-33.5898	25.3618	P0145	2296	0.232655	317	7.11222	0.372549	-11.2383	1
-32.9563	25.06	P0147	853	3.21175	415	7.15451	0.684211	-6.31286	0
-32.9367	24.5261	P0149	1915	1.02215	516	3.55961	0.24	0.695251	0
-33.019	24.6272	P0150	2620	3.45161	467	1.54781	0.277457	-12.1546	0
-33.0921	24.8262	P0151	5495	0.899188	374	1.78273	0.471233	-23.9828	0
-32.9596	24.9005	P0152	807	1.25849	369	3.13921	0.509434	-1.68509	1
-32.9873	25.9017	S0002	3069	0.126274	536	3.93542	0.346341	-36.2661	0
-33.1795	26.6122	S0008	2299	1.11796	364	4.89255	0.555556	45.1643	0
-32.6418	26.255	S0013	5996	0.0409747	669	3.88368	0.476071	-126.211	0
-33.1167	25.9012	S0015	1806	2.12877	517	3.44261	0.247934	-35.5378	0
-33.1973	26.4384	S0017	747	0.0704243	489	13.713	0.408163	-6.18053	0
-32.5433	25.6957	S0022	3390	0.0224152	785	4.78012	0.115556	-344.502	1
-32.9407	26.6421	S0024_B	2536	0.779775	513	4.49775	0.343195	-32.8166	1
-33.0004	26.5272	S0029	2935	0.201198	385	3.65594	0.217617	-88.7399	0
-32.9422	26.6648	S0037	2950	0.100007	505	2.84967	0.563452	76.975	0
-32.9428	26.3428	S0041	1619	0.0791695	550	2.96953	0.333333	-26.9886	0
-32.7571	25.7736	S0045	1789	1.17125	642	3.20532	0.504274	3.9243	0
-32.5736	25.9612	S0046	3138	0.103429	784	17.6664	0.411483	20.5548	0
-33.1693	26.3164	S0056	2671	0.486583	544	15.061	0.384181	21.788	0
-32.6116	25.7855	S0066	9536	0.071863	762	5.21505	0.622433	-224.219	0
-33.0889	26.1831	S0067	19025	1.92711	446	2.0568	0.478329	-1233.6	0
-33.1964	26.3715	S0068	1021	0.00859236	582	3.56364	0.347826	-9.75191	1
-32.9684	25.8111	S0069	10575	1.0463	540	3.44201	0.414184	-43.2792	0
-32.5961	25.7772	S0074	5530	0.464774	769	5.74839	0.672087	-147.219	0
-33.075	26.6133	S0081	1650	0.46155	298	2.52969	0.504587	-10.1878	0
-33.1969	26.6287	S0083	2543	3.11216	285	16.0506	0.443787	-42.9136	0
-33.1062	25.8323	S0085	3793	1.13244	573	14.3193	0.482213	4.3261	0
-33.0047	25.7055	S0086	6485	0.582748	578	6.85298	0.658199	-76.0501	0
-32.9851	25.6368	S0089	8212	0.548881	674	3.72553	0.776147	407.12	0
-33.1518	25.928	S0093	958	0.642114	529	6.70579	0.57377	1.29473	0
-32.5683	26.0027	S0095	2883	0.87002	827	12.4773	0.435233	-105.305	0
-32.5269	26.0462	S0096	3403	0.160464	946	13.9923	0.284444	-414.277	0
-32.9026	26.6384	S0099	8045	0.0313965	424	4.32625	0.43203	-131.308	0
-33.1546	25.8915	S0101	2128	0.482804	525	3.99148	0.524823	0.908236	0
-33.2924	25.9993	S0108	4206	0.579398	371	6.04352	0.384342	-199.114	1
-33.1053	26.4735	S0121	14859	0.563566	396	1.83028	0.750253	-340.077	0
-32.9077	25.5292	S0122	913	3.81309	779	3.8844	0.491803	4.64291	0
-32.9532	25.4996	S0123	2713	0.677382	682	4.97766	0.392265	-79.5003	1
-32.8719	26.6266	S0126	8281	0.0647476	446	4.04148	0.466546	143.555	0
-32.6713	25.892	S0129	10675	0.14453	654	4.18843	0.414669	-599.722	1
-33.1445	26.3648	S0134	16839	0.939518	365	2.11576	0.335415	-820.761	1
-32.859	25.8882	S0140	1116	0.533954	648	6.81097	0.561644	-12.401	1
-32.4426	26.0678	S0141	2817	0.0615817	990	8.40495	0.248649	-177.875	1
-32.2534	25.9606	S0149	2906	0.361349	1041	8.3285	0.512953	-92.4197	0
-32.4464	25.9334	S0152	6206	0	1052	16.1264	0.329298	-565.574	0
-32.5451	25.8466	S0156	6546	0.539088	930	7.08016	0.627002	353.115	0
-32.4275	26.0639	S0157	2393	0.156502	1026	8.13167	0.55414	-71.1269	0
-32.875	25.5964	S0158	2076	0.376284	664	3.2468	0.627737	36.0681	0
-32.4261	25.7826	S0160	5915	0.201275	833	17.1163	0.407125	-298.107	0
-33.2239	26.9351	S0161	7207	2.13625	131	6.6728	0.617464	120.929	0
-33.1465	26.6226	S0163	2192	0.362707	322	1.94496	0.634483	1.85553	0
-32.2367	25.7927	S0181	6967	0	874	1.93016	0.397849	-165.937	1
-32.2737	25.6888	S0183	3165	0.381305	939	8.41777	0.708134	100.223	0
-33.2717	26.8903	S0185	6609	0.0150903	413	6.12006	0.614512	338.188	0
-33.2388	26.9825	S0188	2642	2.15701	66	4.64801	0.344633	-48.1233	0
-33.1975	23.9197	Y0001	5731	0.295124	604	15.632	0.448819	-375.095	0
-33.5185	24.5626	Y0002	2542	0.0082387	568	13.2436	0.384615	-140.606	0
-33.2035	24.5747	Y0003	2899	0.438914	809	17.8013	0.797927	97.1751	0
-33.4955	24.5777	Y0004	2255	0.289542	466	9.90287	0.389262	-53.8883	0
-33.2974	24.7459	Y0006	1241	0.206678	594	24.3115	0.45679	-5.17611	0
-33.2167	23.4685	Y0007	1240	0.47498	847	12.7773	0.518519	8.38792	0
-33.4782	24.2972	Y0008	6156	0.245532	605	15.4494	0.721271	195.638	0
-33.5514	24.383	Y0009	1010	0.0584281	556	18.8792	0.507692	-13.3021	0
-33.4642	24.35	Y0010	2390	0.0239288	531	10.4636	0.636943	27.7525	0
-33.1989	24.4526	Y0011	3879	1.13206	763	11.0979	0.657588	111.299	0
-33.1822	23.725	Y0015	5507	0.484187	716	15.3542	0.605479	-32.7627	0
-33.4473	25.0017	Y0019	12310	1.14187	437	11.7533	0.732034	390.956	0
-33.3976	24.9394	Y0020	796	1.23435	502	5.94457	0.490566	3.39222	0
-33.4198	24.8759	Y0022	2500	0.172805	531	9.63905	0.406061	-25.126	1
-33.3497	24.8741	Y0025	5795	0.0646456	518	4.29866	0.4	-136.064	1
-33.3403	24.8803	Y0026	3055	0.409425	600	7.91894	0.716418	46.779	0
-33.5094	24.7515	Y0027	9599	0.0449956	456	8.47313	0.610675	-655.327	0
-33.2664	24.5996	Y0028	1658	0.452733	756	16.1186	0.486239	-31.5076	0
-33.5297	24.4247	Y0031	4136	0.208128	551	9.3824	0.567766	53.1866	0
-33.2999	24.3792	Y0034	3211	0.730201	454	3.93982	0.431925	-167.583	1
-33.4869	23.9882	Y0036	1303	0.868283	826	3.88668	0.329412	-7.51371	1
-33.0519	24.0389	Y0037	3467	1.93265	844	13.5253	0.572052	-82.3693	0
-33.2036	23.9527	Y0042	6509	2.01909	616	8.47063	0.427252	-517.29	1
-33.1015	23.7716	Y0044	2070	0.084002	838	9.0554	0.255474	-125.125	1
-33.2141	24.0567	Y0048	4045	0.869481	553	2.97592	0.531599	-93.3771	0
-33.1372	24.2752	Y0052	2067	0.603378	575	10.3878	0.613139	18.0957	0
-33.0712	24.1885	Y0053	2151	0.0426908	704	7.61229	0.503546	-10.6488	1
-33.4338	23.0836	Y0055	1364	0.0369708	637	11.2903	0.561798	-2.75584	0
-33.4368	23.1038	Y0056	9758	0.0975323	635	5.65721	0.345146	-858.825	0
-33.4217	23.0813	Y0057	9758	0.051093	697	3.92148	0.520801	73.209	0
-33.4253	23.0944	Y0058	9758	0.23746	655	3.61987	0.51772	-376.683	0
-33.5575	22.6907	Y0059	1383	0.371297	554	5.75331	0.462366	-20.442	0
-33.7664	21.5564	Y0060	1628	0.345734	211	5.07737	0.504587	22.612	0
-33.6677	21.7795	Y0062	24254	0.150158	256	15.044	0.218924	-638.939	0
-33.6956	22.151	Y0064	1104	0.178808	312	14.3679	0.534247	-1.14058	0
-33.6946	22.1385	Y0065	562	1.53135	337	15.7052	0.486486	-1.78975	0
-33.0185	24.1316	Y0066	2177	0.911951	794	7.20952	0.496552	7.39678	0
-33.1254	24.1691	Y0067	3601	0.768496	738	10.717	0.381743	62.8567	0
-33.6945	21.3353	Y0068	19524	0.0903181	397	13.3639	0.548809	-1542.45	0
-33.6438	21.647	Y0071	862	0.351861	324	11.5144	0.421053	-4.31616	0
-33.5277	22.0374	Y0072	7858	1.02101	366	7.54691	0.360845	-340.207	1
-33.7361	21.4068	Y0074	1162	0.822948	218	11.6547	0.415584	-1.88349	0
-33.141	23.9021	Y0077	3490	0.379948	724	6.96079	0.467811	-306.238	1
-33.1816	23.7473	Y0078	5507	0.268893	689	11.2282	0.619178	51.3779	0
-33.2911	24.0319	Y0079	5061	0.378896	601	5.57066	0.72997	-83.5628	0
-33.2645	24.0299	Y0080	3365	1.31377	618	9.02269	0.706667	-44.3566	0
-33.2145	24.0498	Y0081	4045	0.227254	577	11.9609	0.605948	-23.4057	0
-33.209	23.9834	Y0082	4133	0.3819	628	6.13923	0.40293	-59.2627	1
-33.3264	24.2157	Y0083	5590	0.429822	536	7.00748	0.664879	42.3428	0
-33.3876	24.2781	Y0084	2551	0.985438	479	0.864163	0.680473	25.0551	0
-33.4253	23.8568	Y0085	7844	0.387635	796	8.56749	0.403071	-152.52	0
-33.5134	24.0926	Y0086	7847	1.3812	814	13.104	0.460653	118.026	0
-32.9775	23.8159	Y0087	516	0.365554	825	7.44197	0.454545	-1.37154	0
-32.9365	23.7466	Y0088	5242	1.33144	1023	17.3818	0.644699	191.234	0
-32.9151	23.7297	Y0089	5464	0.106806	956	7.76946	0.50137	-9.05041	0
-33.425	23.8602	Y0090	7844	0.822563	792	8.43698	0.439539	-128.262	0
-33.1054	23.8902	Y0092	2138	0.556207	691	23.8346	0.375887	-16.6762	0
-33.4407	24.4931	Y0093	613	1.72363	449	7.87106	0.731707	7.54542	0
-33.545	24.4112	Y0094	1550	1.76312	567	15.0721	0.475248	-22.6883	0
-33.4589	24.4111	Y0095	964	2.15108	559	7.05869	0.538462	-10.6907	0
-33.1163	24.881	Y0096	1146	0.905441	368	1.54917	0.441558	-0.81748	1
-33.4445	24.7897	Y0097	4656	0	366	0.932616	0.271845	-104.487	1
-33.4476	24.8527	Y0098	1204	0.185923	467	13.2023	0.691358	-9.2063	0
-33.5187	24.8066	Y0099	1274	3.51555	472	16.8159	0.4	-24.774	0
-33.5433	24.8595	Y0101	1508	0.0573652	546	6.10811	0.415842	-11.3381	0
-33.3817	24.5826	Y0102	3808	2.80823	526	15.3575	0.482213	25.1622	0
-33.1602	24.82	Y0104	3541	0.107896	439	0.752207	0.586498	-9.32566	0
-33.1108	24.8602	Y0105	2565	0.643693	370	0.466339	0.372781	-3.14776	1
-33.5121	24.8857	Y0106	1891	1.5381	471	3.44422	0.52	-5.03577	0
-33.5209	24.9334	Y0107	1005	3.48747	521	10.3825	0.553846	11.2476	0
